# Supplementary material
Source: PubMed Central journal article supplement (PMC7509864)
Supplement: advancesADV2020002293-suppl1.pdf [file advancesADV2020002293-suppl1.pdf]

SUPPLEMENTAL MATERIALS

Supplemental Table 1. Clinical courses of 6 patients who did not receive systemic treatment within 3 months after diagnosis

| Patient No.<br>Age/Sex | Site of initial involvement | Initial treatment | Response after Initial treatment | Relapse after Initial treatment (relapse site)      | Secondary treatment         | Response after secondary treatment | Outcome (cause of death)<br>(follow-up duration)           |
|------------------------|-----------------------------|-------------------|----------------------------------|-----------------------------------------------------|-----------------------------|------------------------------------|------------------------------------------------------------|
| 1<br>57/M              | Pericardial                 | No therapy        | -                                | No                                                  | -                           | -                                  | CR<br>(147 months)                                         |
| 2<br>98/F              | Pleural<br>Pericardial      | Drainage          | PR                               | Yes (4 months)<br>(Pleural)                         | Drainage                    | CR                                 | Died<br>(unknown cause other than lymphoma)<br>(22 months) |
| 3<br>85/M              | Pleural<br>Pericardial      | Drainage          | CR                               | Yes (29 months)<br>(Pleural, ascites, adrenal mass) | Chemotherapy<br>(R-THP-COP) | PR                                 | Died<br>(lymphoma)<br>(43 months)                          |
| 4                      | Pleural                     | Drainage          | CR                               | No                                                  | -                           | -                                  | CR                                                         |

|           |         |          |    |    |   |   |                   |
|-----------|---------|----------|----|----|---|---|-------------------|
| 87/M      |         |          |    |    |   |   | (5 months)        |
| 5<br>78/F | Pleural | Drainage | CR | No | - | - | CR<br>(24 months) |

Pleural, pleural effusion; Pericardial, pericardial effusion; Drainage, effusion drainage; PD, progressive disease; R-THP-COP, rituximab, pirarubicin, cyclophosphamide, vincristine, and prednisolone; CR, complete response; PR, partial response

Supplemental table 2. Univariate and Multivariate Analysis of Clinical Characteristics for PFS

| Variable | No. | Univariate Analysis      |         | Multivariate Analysis    |         |
|----------|-----|--------------------------|---------|--------------------------|---------|
|          |     | Hazard ratio<br>(95% CI) | P-value | Hazard ratio<br>(95% CI) | P-value |
| Age      |     |                          | 0.062   |                          | 0.033   |
| < 70 y   | 12  | 1.00                     |         | 1.00                     |         |
| ≥ 70 y   | 52  | 4.18<br>(0.93-18.76)     |         | 5.26<br>(1.15-24.12)     |         |
| Sex      |     |                          | 0.106   |                          |         |
| Male     | 40  | 1.00                     |         |                          |         |
| Female   | 24  | 2.13<br>(0.85-5.33)      |         |                          |         |
| PS       |     |                          | 0.025   |                          | 0.008   |
| 0, 1     | 33  | 1.00                     |         | 1.00                     |         |
| 2-4      | 29  | 3.04                     |         | 4.19                     |         |

|                  |    |                     |       |              |  |
|------------------|----|---------------------|-------|--------------|--|
|                  |    | (1.15-8.03)         |       | (1.46-12.01) |  |
| B symptom        |    |                     | 0.120 |              |  |
| No               | 53 | 1.00                |       |              |  |
| Yes              | 8  | 2.42<br>(0.80-7.35) |       |              |  |
| Serum LDH level  |    |                     | 0.798 |              |  |
| Not elevated     | 21 | 1.00                |       |              |  |
| Elevated         | 42 | 1.14<br>(0.43-2.99) |       |              |  |
| Hb concentration |    |                     | 0.472 |              |  |
| ≥ 12 g/dl        | 30 | 1.00                |       |              |  |
| < 12 g/dl        | 34 | 1.40<br>(0.56-3.45) |       |              |  |
| IPI              |    |                     | 0.122 |              |  |
| 0-2              | 13 | 1.00                |       |              |  |

|                                                         |    |                      |       |  |  |
|---------------------------------------------------------|----|----------------------|-------|--|--|
| $\geq 3$                                                | 48 | 4.94<br>(0.65-37.37) |       |  |  |
| Underlying medical condition leading to fluid retention |    |                      | 0.428 |  |  |
| No                                                      | 34 | 1.00                 |       |  |  |
| Yes                                                     | 30 | 1.44<br>(0.58-3.56)  |       |  |  |
| Pleural effusion                                        |    |                      | 0.495 |  |  |
| No                                                      | 15 | 1.00                 |       |  |  |
| Yes                                                     | 49 | 0.72<br>(0.28-1.85)  |       |  |  |
| Pericardial effusion                                    |    |                      | 0.246 |  |  |
| No                                                      | 26 | 1.00                 |       |  |  |
| Yes                                                     | 38 | 0.57<br>(0.22-1.47)  |       |  |  |

|                                |    |                     |       |                      |       |
|--------------------------------|----|---------------------|-------|----------------------|-------|
| Ascites                        |    |                     | 0.022 |                      | 0.001 |
| No                             | 57 | 1.00                |       | 1.00                 |       |
| Yes                            | 7  | 3.73<br>(1.21-11.5) |       | 7.31<br>(2.16-24.68) |       |
| Number of sites of involvement |    |                     | 0.519 |                      |       |
| Single lesion                  | 38 | 1.00                |       |                      |       |
| Multiple lesion                | 26 | 0.73<br>(0.29-1.88) |       |                      |       |
| Year of diagnosis              |    |                     | 0.837 |                      |       |
| 2011-2014                      | 33 | 1.00                |       |                      |       |
| 1998-2010                      | 31 | 1.12<br>(0.39-3.16) |       |                      |       |
| CD20 expression                |    |                     | 0.509 |                      |       |
| Negative                       | 2  | 1.00                |       |                      |       |
| Positive                       | 62 | 0.50                |       |                      |       |

|                               |    |                     |       |  |  |
|-------------------------------|----|---------------------|-------|--|--|
|                               |    | (0.07-3.86)         |       |  |  |
| Cell-of-origin                |    |                     | 0.384 |  |  |
| GC phenotype                  | 8  | 1.00                |       |  |  |
| Non-GC phenotype              | 30 | 1.79<br>(0.48-6.63) |       |  |  |
| <i>MYC break apart</i> (FISH) |    |                     | 0.696 |  |  |
| Negative                      | 29 | 1.00                |       |  |  |
| Positive                      | 7  | 0.74<br>(0.16-3.40) |       |  |  |

PS, performance status; LDH lactate dehydrogenase; Hb, hemoglobin; IPI, international prognostic index; GC, germinal center; FISH, fluorescent *in situ* hybridization; PFS, progression free survival
